# Supplementary material for: Infants Admitted to US Intensive Care Units for RSV Infection During the 2022 Seasonal Peak
Source: PubMed Central journal article supplement (PMC10427947; doi:10.1001/jamanetworkopen.2023.28950), 2023-08-15
Supplement: jamanetwopen-e2328950-s001.pdf [file jamanetwopen-e2328950-s001.pdf]

## Supplemental Online Content

Halasa N, Zambrano LD, Amarin JZ, et al; RSV-PIC Investigators. Infants admitted to US intensive care units for RSV infection during the 2022 seasonal peak. *JAMA Netw Open*. 2023;6(8):e2328950. doi:10.1001/jamanetworkopen.2023.28950

### **eAppendix.** Definitions

#### **eFigure.** Age Distribution of Infants Requiring Intensive Care for RSV Infection

**eTable 1.** Underlying Medical Conditions Present in at Least 5 Critically Ill Infants With RSV, by Intubation Status

**eTable 2.** Clinical Characteristics of Infants Who Received ECMO or Died During Their Hospitalization

**eTable 3.** Clinical Characteristics of Infants Who Received Palivizumab Before Hospitalization

**eTable 4.** Probable or Confirmed Bacterial Coinfections Isolated Within 72 Hours of Admission Among Critically Ill Children With RSV, by Intubation Status, Underlying Medical Condition Status, and Specimen Type

**eTable 5.** Viral Codetections Among Critically Ill Children With RSV, by Intubation Status

This supplemental material has been provided by the authors to give readers additional information about their work.

## **eAppendix. Definitions**

### **Underlying Medical Conditions**

Underlying conditions included respiratory (chronic restrictive lung disease, bronchopulmonary dysplasia, cystic fibrosis, recurrent aspiration into lungs, pulmonary hypertension, interstitial lung disease, agenesis, hypoplasia, or other congenital lung deformity, obstructive sleep apnea, tracheomalacia/bronchomalacia/laryngomalacia, subglottic or supraglottic stenosis, tracheoesophageal fistula, tracheal vascular ring, micrognathia/retrognathia, choanal atresia), cardiac (congenital heart disease, cardiac repair, acquired heart disease, arrhythmia, systemic hypertension), neurologic/neuromuscular, oncologic, immunosuppressive, rheumatologic (autoimmune) disorder, hematologic, renal or urologic, gastrointestinal or hepatic, endocrine, metabolic or genetic disorders, and atopic/allergic conditions. Non-respiratory, non-cardiac disease included all those with an underlying medical condition that was *not* respiratory or cardiac in nature. Non-respiratory cardiac diseases included those with an underlying cardiac condition without a co-occurring respiratory condition.

### **Pediatric Acute Respiratory Distress Syndrome (PARDS)**

PARDS was defined by the following criteria being met within 24 hours: acute onset of hypoxemia; chest imaging with new infiltrates; respiratory failure not explained by cardiac failure or volume overload; and either  $P_aO_2/F_iO_2$  ratio  $\leq 300$  or, if arterial blood gas was not available,  $SpO_2/F_iO_2 < 264$  (if  $SpO_2 < 97$ ) if on continuous positive airway pressure (CPAP)  $> 5$  cm  $H_2O$ , bilevel positive airway pressure (BiPAP), or invasive mechanical ventilation.

**eFigure. Age Distribution of Infants Requiring Intensive Care for RSV Infection** Distribution of age (in months) among 600 infants admitted to the intensive care unit or high acuity unit with respiratory syncytial virus infection, stratified by intubation status.

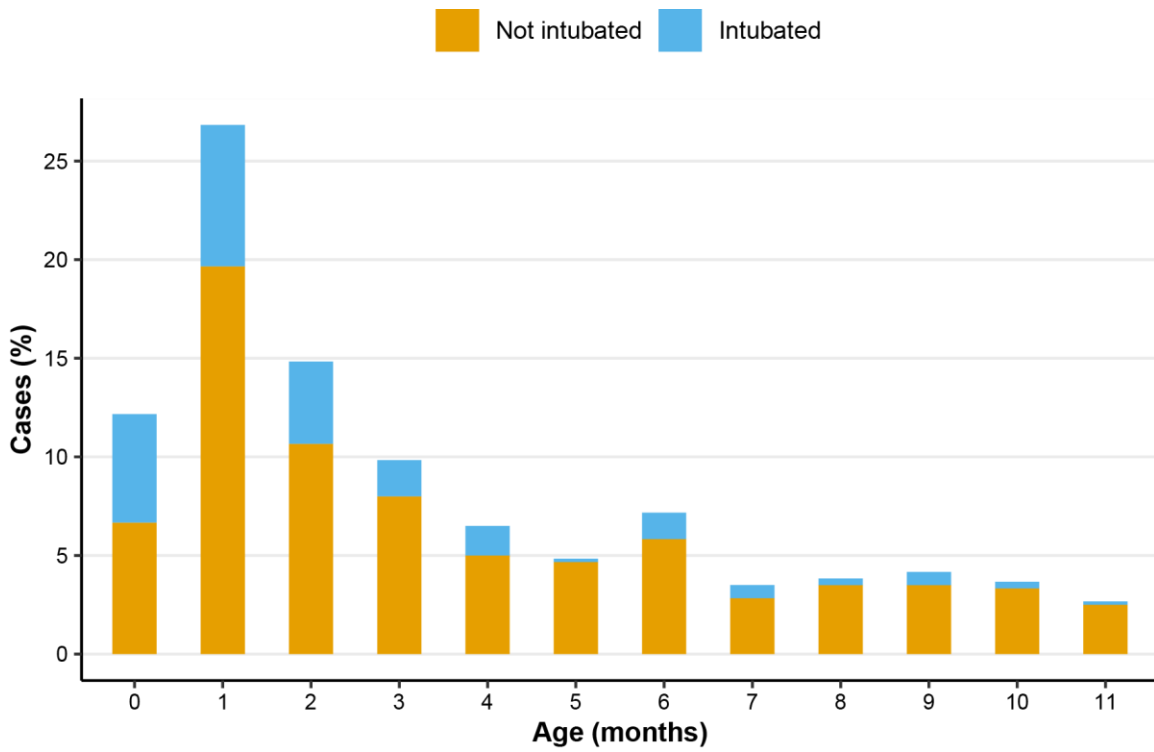

**eTable 1. Underlying Medical Conditions Present in at Least 5 Critically Ill Infants With RSV, by Intubation Status**

| Underlying medical condition                                                                                                                                                 | All (n=600) | Non-intubated (n=457) | Intubated (n=143) | P value |
|------------------------------------------------------------------------------------------------------------------------------------------------------------------------------|-------------|-----------------------|-------------------|---------|
| Respiratory disorder                                                                                                                                                         | 45 (7.5)    | 32 (7.0)              | 13 (9.1)          | 0.41    |
| Reactive airway disease/recurrent wheezing                                                                                                                                   | 8 (1.3)     | 8 (1.8)               | 0                 | 0.21*   |
| Chronic lung disease                                                                                                                                                         | 22 (3.7)    | 14 (3.1)              | 8 (5.6)           | 0.16    |
| Bronchopulmonary dysplasia                                                                                                                                                   | 19 (3.2)    | 13 (2.8)              | 6 (4.2)           | 0.42    |
| Upper airway disorder                                                                                                                                                        | 12 (2.0)    | 9 (2.0)               | 3 (2.1)           | >0.99*  |
| Tracheomalacia, bronchomalacia, or laryngomalacia                                                                                                                            | 7 (1.2)     | 5 (1.1)               | 2 (1.4)           | 0.67*   |
| Cardiovascular disorder                                                                                                                                                      | 35 (5.8)    | 24 (5.3)              | 11 (7.7)          | 0.28    |
| Congenital heart disease                                                                                                                                                     | 31 (5.2)    | 21 (4.6)              | 10 (7.0)          | 0.26    |
| Atrial septal defect, ventricular septal defect, atrioventricular septal defect, or atrioventricular canal                                                                   | 20 (3.3)    | 14 (3.1)              | 6 (4.2)           | 0.51    |
| Abnormalities of aortic arch (e.g., coarctation of aorta, double aortic arch, interrupted aortic arch, hypoplastic aortic arch, right-sided aortic arch, truncus arteriosus) | 6 (1.0)     | 3 (0.7)               | 3 (2.1)           | 0.15*   |
| History of cardiac repair (surgery or interventional catheterization)                                                                                                        | 11 (1.8)    | 7 (1.5)               | 4 (2.8)           | 0.30*   |
| Neurologic or neuromuscular disorder                                                                                                                                         | 13 (2.2)    | 9 (2.0)               | 4 (2.8)           | 0.52*   |
| Disorders of tone (e.g., hypotonia, dystonia, spasticity, hypertonia, cerebral palsy, spastic quadriplegia, quadriparesis)                                                   | 5 (0.8)     | 3 (0.7)               | 2 (1.4)           | 0.34*   |
| Intraventricular hemorrhage, anoxic or traumatic brain injury, hypoxic ischemic encephalopathy, or static encephalopathy                                                     | 5 (0.8)     | 5 (1.1)               | 0                 | 0.60*   |
| Hematologic disorder                                                                                                                                                         | 5 (0.8)     | 4 (0.9)               | 1 (0.7)           | >0.99*  |
| Renal or urologic dysfunction                                                                                                                                                | 13 (2.2)    | 11 (2.4)              | 2 (1.4)           | 0.74*   |
| Gastrointestinal or hepatic disorder                                                                                                                                         | 35 (5.8)    | 27 (5.9)              | 8 (5.6)           | 0.89    |
| Gastroesophageal reflux requiring treatment (e.g. surgery or medication)                                                                                                     | 22 (3.7)    | 18 (3.9)              | 4 (2.8)           | 0.62*   |

| <b>Underlying medical condition</b>                                                                                                                                 | <b>All<br/>(n=600)</b> | <b>Non-<br/>intubated<br/>(n=457)</b> | <b>Intubated<br/>(n=143)</b> | <b>P<br/>value</b> |
|---------------------------------------------------------------------------------------------------------------------------------------------------------------------|------------------------|---------------------------------------|------------------------------|--------------------|
| Feeding through a tube (i.e. not a temporary nasogastric tube but a long-lasting gastric or jejunal tube)                                                           | 15 (2.5)               | 9 (2.0)                               | 6 (4.2)                      | 0.14               |
| Dysphagia (or swallowing dysfunction)                                                                                                                               | 7 (1.2)                | 5 (1.1)                               | 2 (1.4)                      | 0.67*              |
| Surgical or congenital gastrointestinal disease (e.g., short gut or bowel syndrome, gastroschisis, omphalocele, malrotation, midgut volvulus, Hirschsprung disease) | 5 (0.8)                | 4 (0.9)                               | 1 (0.7)                      | >0.99<br>*         |
| Endocrine disorder                                                                                                                                                  | 7 (1.2)                | 6 (1.3)                               | 1 (0.7)                      | >0.99<br>*         |
| Hypothyroidism                                                                                                                                                      | 5 (0.8)                | 4 (0.9)                               | 1 (0.7)                      | >0.99<br>*         |
| Metabolic or genetic disorder                                                                                                                                       | 13 (2.2)               | 11 (2.4)                              | 2 (1.4)                      | 0.74*              |
| Trisomy 21                                                                                                                                                          | 8 (1.3)                | 8 (1.8)                               | 0                            | 0.21*              |
| Atopic or allergic condition                                                                                                                                        | 11 (1.8)               | 11 (2.4)                              | 0                            | 0.07*              |
| Eczema (or atopic dermatitis)                                                                                                                                       | 10 (1.7)               | 10 (2.2)                              | 0                            | 0.13*              |

\*Indicates that fisher exact test was run since the cell sizes were small (<5).

**eTable 2. Clinical Characteristics of Infants Who Received ECMO or Died During Their Hospitalization**

For privacy, age is rounded to the closest month and gestational age is given in a range.

| Characteristic                   | Death 1 (ECMO)                                                                                                                 | Death 2 (no ECMO)                                                                                            | ECMO 1 Survivor                                                                                                        | ECMO 2 Survivor                                                                                   | ECMO 3 Survivor                                                                                                                                                   |
|----------------------------------|--------------------------------------------------------------------------------------------------------------------------------|--------------------------------------------------------------------------------------------------------------|------------------------------------------------------------------------------------------------------------------------|---------------------------------------------------------------------------------------------------|-------------------------------------------------------------------------------------------------------------------------------------------------------------------|
| Age (months)                     | 10                                                                                                                             | 8                                                                                                            | 11                                                                                                                     | 2                                                                                                 | 1                                                                                                                                                                 |
| Sex                              | Male                                                                                                                           | Female                                                                                                       | Male                                                                                                                   | Male                                                                                              | Male                                                                                                                                                              |
| Race                             | Unknown                                                                                                                        | Unknown                                                                                                      | Black                                                                                                                  | White                                                                                             | Black                                                                                                                                                             |
| Ethnicity                        | Hispanic/Latino                                                                                                                | Unknown                                                                                                      | Non-Hispanic                                                                                                           | Non-Hispanic                                                                                      | Non-Hispanic                                                                                                                                                      |
| Region                           | South                                                                                                                          | South                                                                                                        | Midwest                                                                                                                | Midwest                                                                                           | South                                                                                                                                                             |
| Gestational age at birth (weeks) | 27–28                                                                                                                          | ≥37                                                                                                          | <25                                                                                                                    | 29–30                                                                                             | ≥37                                                                                                                                                               |
| Underlying conditions            | BPD; failure to thrive                                                                                                         | None                                                                                                         | BPD                                                                                                                    | None                                                                                              | None                                                                                                                                                              |
| Symptoms prior to admission      | Cough, runny nose, rapid or shallow breathing, wheezing, chest retractions or abdominal breathing, poor feeding, nasal flaring | Fever, cough, rapid or shallow breathing, poor feeding, difficult to arouse or increased sleepiness, seizure | Fever, cough, runny nose, rapid or shallow breathing, wheezing, chest retractions or abdominal breathing, irritability | Cough, runny nose, apnea, poor feeding, irritability, difficult to arouse or increased sleepiness | Cough, runny nose, rapid or shallow breathing, apnea, poor feeding, sleepiness/difficult to rouse, pale, grey, and mottled skin with capillary refill > 3 seconds |
| Day of death                     | 18 days                                                                                                                        | 7 days                                                                                                       | N/A                                                                                                                    | N/A                                                                                               | N/A                                                                                                                                                               |
| Invasive mechanical ventilation  | Yes                                                                                                                            | Yes                                                                                                          | Yes                                                                                                                    | Yes                                                                                               | Yes                                                                                                                                                               |

| Characteristic                                                                                                 | Death 1 (ECMO)                                                                                                                                                                                                                                                             | Death 2 (no ECMO)                                                                                  | ECMO 1 Survivor                                                                                                                                                                                                                                                                                                                                                                                                                   | ECMO 2 Survivor                                                  | ECMO 3 Survivor                                                                                                                                                       |
|----------------------------------------------------------------------------------------------------------------|----------------------------------------------------------------------------------------------------------------------------------------------------------------------------------------------------------------------------------------------------------------------------|----------------------------------------------------------------------------------------------------|-----------------------------------------------------------------------------------------------------------------------------------------------------------------------------------------------------------------------------------------------------------------------------------------------------------------------------------------------------------------------------------------------------------------------------------|------------------------------------------------------------------|-----------------------------------------------------------------------------------------------------------------------------------------------------------------------|
| Bacterial lower respiratory tract coinfection (endotracheal tube or tracheostomy or bronchoscopy) <sup>a</sup> | <ul style="list-style-type: none"> <li>· <i>Moraxella catarrhalis</i>; abundance=abundant (day 8)</li> <li>· <i>Staphylococcus aureus</i> (methicillin-resistant); abundance=moderate (day 8)</li> <li>· <i>Serratia marcescens</i> abundance=moderate (day 17)</li> </ul> | <ul style="list-style-type: none"> <li>· <i>Pseudomonas</i>; abundance=abundant (day 6)</li> </ul> | <ul style="list-style-type: none"> <li>· <i>Haemophilus influenzae</i> (nontypeable); abundance=many (day 1=day of admission)</li> <li>· <i>Staphylococcus aureus</i> (methicillin-sensitive); abundance=few (day 1)</li> <li>· <i>Moraxella catarrhalis</i>; abundance=moderate (day 1)</li> <li>· Viridans group Streptococci; abundance=many (day 1)</li> <li>· <i>Enterobacter cloacae</i>; abundance=few (day 16)</li> </ul> | None                                                             | <ul style="list-style-type: none"> <li>· <i>Pseudomonas</i>; abundance=few (day 19)</li> <li>· <i>Stenotrophomonas maltophilia</i>; abundance=few (day 19)</li> </ul> |
| Viral codetection <sup>a</sup>                                                                                 | Rhinovirus/enterovirus                                                                                                                                                                                                                                                     | Coronavirus OC43                                                                                   | Rhinovirus/enterovirus                                                                                                                                                                                                                                                                                                                                                                                                            | Influenza (untyped) codetection; other viral tests not performed | Adenovirus                                                                                                                                                            |

<sup>a</sup>Bacterial coinfection and viral codetection were within 72 hours of admission. **Abbreviations:** ECMO, extracorporeal membrane oxygenation; BPD, bronchopulmonary dysplasia.

**eTable 3. Clinical Characteristics of Infants Who Received Palivizumab Before Hospitalization**

For privacy, age is rounded to the closest month, and gestational age is given in a range.

| Characteristic                             | Palivizumab Infant 1<br>(Death 1 from eTable 2)                                                                                | Palivizumab Infant 2                                                                              | Palivizumab Infant 3                                                                                                                           |
|--------------------------------------------|--------------------------------------------------------------------------------------------------------------------------------|---------------------------------------------------------------------------------------------------|------------------------------------------------------------------------------------------------------------------------------------------------|
| Age (months)                               | 10                                                                                                                             | 8                                                                                                 | 10                                                                                                                                             |
| Sex                                        | Male                                                                                                                           | Male                                                                                              | Male                                                                                                                                           |
| Race                                       | Unknown                                                                                                                        | White                                                                                             | White                                                                                                                                          |
| Ethnicity                                  | Hispanic/Latino                                                                                                                | Non-Hispanic                                                                                      | Non-Hispanic                                                                                                                                   |
| Region                                     | South                                                                                                                          | South                                                                                             | Northeast                                                                                                                                      |
| Palivizumab received within prior 30 days? | No                                                                                                                             | No                                                                                                | No                                                                                                                                             |
| Gestational age at birth (weeks)           | 27-28                                                                                                                          | 28–29                                                                                             | ≥37                                                                                                                                            |
| Underlying conditions                      | BPD; Failure to thrive                                                                                                         | Congenital heart defect; BPD; Hypothyroidism                                                      | Trisomy 21; Congenital heart defect; Tracheobronchomalacia; Gastroesophageal reflux with feeding tube; Hypothyroidism                          |
| Symptoms prior to admission                | Cough, runny nose, rapid or shallow breathing, wheezing, chest retractions or abdominal breathing, poor feeding, nasal flaring | Cough, runny nose, rapid or shallow breathing, wheezing, chest retractions or abdominal breathing | Fever, cough, runny nose, rapid or shallow breathing, wheezing, chest retractions or abdominal breathing, diarrhea, poor feeding, irritability |
| Invasive mechanical ventilation            | Yes                                                                                                                            | Yes                                                                                               | No                                                                                                                                             |
| ECMO                                       | Yes                                                                                                                            | No                                                                                                | No                                                                                                                                             |
| Bacterial coinfection documented           | <i>Moraxella catarrhalis</i> (LRT, abundant); MRSA (LRT, moderate); <i>S. marcescens</i> (LRT, moderate)                       | No                                                                                                | No                                                                                                                                             |
| Viral codetection documented               | Rhinovirus/enterovirus                                                                                                         | No                                                                                                | No                                                                                                                                             |

**Abbreviations:** BPD, bronchopulmonary dysplasia; ECMO, extracorporeal membrane oxygenation.



**eTable 4. Probable or Confirmed Bacterial Coinfections Isolated Within 72 Hours of Admission Among Critically Ill Children With RSV, by Intubation Status, Underlying Medical Condition Status, and Specimen Type**

|                                                    | All (n=600)  | Non-intubated (n=457) | Intubated (n=143) | History of $\geq 1$ underlying condition (n=113) |
|----------------------------------------------------|--------------|-----------------------|-------------------|--------------------------------------------------|
| Tracheal/lower respiratory pathogen                | 28/42 (66.7) | NA                    | 28/42 (66.7)      | 2/6 (33.3)                                       |
| <i>Streptococcus pneumoniae</i>                    | 8/28 (28.6)  | NA                    | 8/28 (28.6)       | 0                                                |
| <i>Moraxella catarrhalis</i>                       | 9/28 (32.1)  | NA                    | 9/28 (32.1)       | 3/6 (50.0)                                       |
| <i>Haemophilus influenzae</i> non-typeable         | 12/28 (42.9) | NA                    | 12/28 (42.9)      | 2/6 (33.3)                                       |
| <i>Haemophilus influenzae</i> type B               | 1/28 (3.6)   | NA                    | 1/28 (3.6)        | 0                                                |
| <i>Pseudomonas</i> spp.                            | 1/28 (3.6)   | NA                    | 1/28 (3.6)        | 1/6 (16.7)                                       |
| Methicillin-resistant <i>Staphylococcus aureus</i> | 1/28 (3.6)   | NA                    | 1/28 (3.6)        | 0                                                |
| Methicillin-sensitive <i>Staphylococcus aureus</i> | 1/28 (3.6)   | NA                    | 1/28 (3.6)        | 1/6 (16.7)                                       |
| <i>Escherichia coli</i>                            | 1/28 (3.6)   | NA                    | 1/28 (3.6)        | 0                                                |
| <i>Klebsiella</i> spp.                             | 1/28 (3.6)   | NA                    | 1/28 (3.6)        | 0                                                |
| Blood                                              | 2/11 (18.2)  | 0/6 (0)               | 2/5 (40.0)        | 0                                                |
| <i>Streptococcus pneumoniae</i>                    | 1/2 (50.0)   | 0                     | 1/2 (50.0)        | 0                                                |
| Methicillin-sensitive <i>Staphylococcus aureus</i> | 1/2 (50.0)   | 0                     | 1/2 (50.0)        | 0                                                |
| <i>Acinetobacter baumannii</i>                     | 1/2 (50.0)   | 0                     | 1/2 (50.0)        | 0                                                |
| Urine                                              | 8/22 (36.4)  | 5/13 (38.5)           | 3/9 (33.3)        | 1/4 (25.0)                                       |
| <i>Escherichia coli</i>                            | 5/8 (62.5)   | 3/5 (60.0)            | 2/3 (66.7)        | 1 (100)                                          |
| <i>Klebsiella</i> spp.                             | 3/8 (37.5)   | 2/5 (40.0)            | 1/3 (33.3)        | 0                                                |

**eTable 5. Viral Codetections Among Critically Ill Children With RSV, by Intubation Status**

|                                   | All (n=600) | Non-intubated (n=457) | Intubated (n=143) |
|-----------------------------------|-------------|-----------------------|-------------------|
| Respiratory viral panel performed | 304         | 221                   | 83                |
| Rhinovirus/enterovirus detected   | 85 (28.0)   | 62 (28.1)             | 23 (27.7)         |
| All other virus positive          | 33 (10.9)   | 24 (10.9)             | 9 (10.8)          |
| Parainfluenza virus               | 13 (4.3)    | 9 (4.1)               | 4 (4.8)           |
| Type 1                            | 8 (2.6)     | 5 (2.3)               | 3 (3.6)           |
| Type 2                            | 3 (1.0)     | 2 (0.9)               | 1 (1.2)           |
| Type 3                            | 4 (1.3)     | 3 (1.4)               | 1 (1.2)           |
| Type 4                            | 6 (2.0)     | 4 (1.8)               | 2 (2.4)           |
| Human metapneumovirus             | 5 (1.6)     | 4 (1.8)               | 1 (1.2)           |
| Adenovirus                        | 17 (5.6)    | 13 (5.9)              | 4 (4.8)           |
| Seasonal coronaviruses            | 5 (1.6)     | 2 (0.9)               | 3 (3.6)           |
| 229E                              | 1 (0.3)     | 0                     | 1 (1.2)           |
| HKU1                              | 2 (0.7)     | 0                     | 2 (2.4)           |
| NL63                              | 2 (0.7)     | 1 (0.5)               | 1 (1.2)           |
| OC43                              | 3 (1.0)     | 1 (0.5)               | 2 (2.4)           |
