# Supplementary material for: Infants Admitted to US Intensive Care Units for RSV Infection During the 2022 Seasonal Peak
Source: PubMed Central journal article supplement (PMC10427947; doi:10.1001/jamanetworkopen.2023.28950), 2023-08-15
Supplement: jamanetwopen-e2328950-s002.pdf [file jamanetwopen-e2328950-s002.pdf]

## Supplemental Online Content: Nonauthor Collaborators

\*First name, last name, and suffix (if applicable) are required and will appear in PubMed.

| <b>*Group Name(s): RSV-PIC Investigators</b> |                   |                              |                  |                                      |                                          |                                                         |                                                                                            |
|----------------------------------------------|-------------------|------------------------------|------------------|--------------------------------------|------------------------------------------|---------------------------------------------------------|--------------------------------------------------------------------------------------------|
| <b>*First Name and Middle Initial(s)</b>     | <b>*Last Name</b> | <b>*Suffix (eg, Jr, III)</b> | Academic Degrees | Institution                          | Location (city, state/province, country) | Role or Contribution, eg, chair, principal investigator | Group (if more than 1 Group listed in the byline) and/or Subgroup (eg, Steering Committee) |
| Merry                                        | Tomcany           |                              | BSN, RN          | Akron Children's Hospital            | Akron, Ohio, USA                         | Collaborator                                            |                                                                                            |
| Kelly N.                                     | Michelson         |                              | MD, MPH          | Ann & Robert H. Lurie Children's Hos | Chicago, Illinois, USA                   | Collaborator                                            |                                                                                            |
| Heather E.                                   | Price             |                              | MS, CRA          | Ann & Robert H. Lurie Children's Hos | Chicago, Illinois, USA                   | Collaborator                                            |                                                                                            |
| Ronald C.                                    | Sanders           | Jr                           | MD               | Arkansas Children's Hospital         | Little Rock, Arkansas, USA               | Collaborator                                            |                                                                                            |
| Lexie                                        | Dixon             |                              | BA               | Arkansas Children's Hospital         | Little Rock, Arkansas, USA               | Collaborator                                            |                                                                                            |
| Katri V.                                     | Typpo             |                              | MD, MPH          | Banner Children's at Diamond Childre | Tucson, Arizona, USA                     | Collaborator                                            |                                                                                            |
| Ilana                                        | Harwayne-Gidansky |                              | MD, MA           | Bernard & Millie Duker Children's Ho | Albany, New York, USA                    | Collaborator                                            |                                                                                            |
| Suden                                        | Kucukak           |                              | MD               | Boston Children's Hospital           | Boston, Massachusetts, US                | Collaborator                                            |                                                                                            |
| Elizabeth R.                                 | McNamara          |                              | BSN, RN          | Boston Children's Hospital           | Boston, Massachusetts, US                | Collaborator                                            |                                                                                            |
| Sabrina R.                                   | Chen              |                              | BS               | Boston Children's Hospital           | Boston, Massachusetts, US                | Collaborator                                            |                                                                                            |
| Eve                                          | Listerud          |                              |                  | Boston Children's Hospital           | Boston, Massachusetts, US                | Collaborator                                            |                                                                                            |
| Ofelia                                       | Vargas-Shiraishi  |                              | BS               | Children's Health of Orange County   | Orange, California, USA                  | Collaborator                                            |                                                                                            |
| Betty                                        | Oberle            |                              | BSN, RN          | Children's Hospital & Medical Center | Omaha, Nebraska, USA                     | Collaborator                                            |                                                                                            |
| Frances                                      | Zorensky          |                              | BA               | Children's Hospital Colorado         | Aurora, Colorado, USA                    | Collaborator                                            |                                                                                            |
| Rachel                                       | Mansour           |                              | BSN, RN, C       | Children's Hospital Colorado         | Aurora, Colorado, USA                    | Collaborator                                            |                                                                                            |
| Jaycee                                       | Jumarang          |                              | MD               | Children's Hospital Los Angeles      | Los Angeles, California, US              | Collaborator                                            |                                                                                            |
| Marla                                        | Johnston          |                              | MSN, RN          | Children's Hospital New Orleans      | New Orleans, Louisiana, US               | Collaborator                                            |                                                                                            |
| Jenny L.                                     | Bush              |                              | RNC, BSN         | Children's Hospital of Philadelphia  | Philadelphia, Pennsylvania,              | Collaborator                                            |                                                                                            |
| Shawn                                        | Dickey            |                              | MHA              | Children's Hospital of Philadelphia  | Philadelphia, Pennsylvania,              | Collaborator                                            |                                                                                            |
| Shannon                                      | Hill              |                              | BSN              | Children's Mercy Kansas City         | Kansas City, Missouri, USA               | Collaborator                                            |                                                                                            |
| Melissa                                      | Sullivan          |                              | BSN              | Children's Mercy Kansas City         | Kansas City, Missouri, USA               | Collaborator                                            |                                                                                            |
| Abigail                                      | Kietzman          |                              | ACRP-CP          | Children's Mercy Kansas City         | Kansas City, Missouri, USA               | Collaborator                                            |                                                                                            |
| Candice                                      | Colston           |                              |                  | Children's of Alabama                | Birmingham, Alabama, USA                 | Collaborator                                            |                                                                                            |
| Meghan                                       | Murdock           |                              | RN               | Children's of Alabama                | Birmingham, Alabama, USA                 | Collaborator                                            |                                                                                            |
| Heather                                      | Kelley            |                              | RN               | Children's of Alabama                | Birmingham, Alabama, USA                 | Collaborator                                            |                                                                                            |
| Laura                                        | Wright-Sexton     |                              | MD               | Children's of Mississippi            | Jackson, Mississippi, USA                | Collaborator                                            |                                                                                            |
| Maygan                                       | Martin            |                              | RN               | Children's of Mississippi            | Jackson, Mississippi, USA                | Collaborator                                            |                                                                                            |
| Lora                                         | Martin            |                              | MSN              | Children's of Mississippi            | Jackson, Mississippi, USA                | Collaborator                                            |                                                                                            |
| Lacy                                         | Malloch           |                              | BS               | Children's of Mississippi            | Jackson, Mississippi, USA                | Collaborator                                            |                                                                                            |
| Kayla                                        | Patterson         |                              | MS               | Children's of Mississippi            | Jackson, Mississippi, USA                | Collaborator                                            |                                                                                            |

## Supplemental Online Content: Nonauthor Collaborators

\*First name, last name, and suffix (if applicable) are required and will appear in PubMed.

| *First Name and Middle Initial(s) | *Last Name      | *Suffix (eg, Jr, III) | Academic Degrees | Institution                                   | Location (city, state/province, country) | Role or Contribution, eg, chair, principal investigator | Group (if more than 1 Group listed in the byline and/or Subgroup (eg, Steering Committee)) |
|-----------------------------------|-----------------|-----------------------|------------------|-----------------------------------------------|------------------------------------------|---------------------------------------------------------|--------------------------------------------------------------------------------------------|
| Cameron                           | Sanders         |                       | BS               | Children's of Mississippi                     | Jackson, Mississippi, USA                | Collaborator                                            |                                                                                            |
| Chelsea                           | Rohlf           |                       | MBA              | Cincinnati Children's Hospital Medical Center | Cincinnati, Ohio, USA                    | Collaborator                                            |                                                                                            |
| Marilyn                           | Rice            |                       | MS               | Cincinnati Children's Hospital Medical Center | Cincinnati, Ohio, USA                    | Collaborator                                            |                                                                                            |
| Miranda                           | Howard          |                       | BS               | Cincinnati Children's Hospital Medical Center | Cincinnati, Ohio, USA                    | Collaborator                                            |                                                                                            |
| Makayla                           | Murphy          |                       | MPH              | Connecticut Children's Medical Center         | Hartford, Connecticut, USA               | Collaborator                                            |                                                                                            |
| Vijaya L.                         | Soma            |                       | MD               | Hassenfeld Children's Hospital at NYU Langone | New York, New York, USA                  | Collaborator                                            |                                                                                            |
| Adam J.                           | Ratner          |                       | MD               | Hassenfeld Children's Hospital at NYU Langone | New York, New York, USA                  | Collaborator                                            |                                                                                            |
| Megan J.                          | Job             |                       | BA               | Hassenfeld Children's Hospital at NYU Langone | New York, New York, USA                  | Collaborator                                            |                                                                                            |
| Colleen                           | Mennie          |                       | BSN              | Johns Hopkins Children's Center               | Baltimore, Maryland, USA                 | Collaborator                                            |                                                                                            |
| Kamala                            | Simkhada        |                       | BSN, MPH         | Johns Hopkins Children's Center               | Baltimore, Maryland, USA                 | Collaborator                                            |                                                                                            |
| Noelle M.                         | Drapeau         |                       | BA               | Mayo Clinic Children's Center                 | Rochester, Minnesota, USA                | Collaborator                                            |                                                                                            |
| Supriya                           | Behl            |                       | MSc              | Mayo Clinic Children's Center                 | Rochester, Minnesota, USA                | Collaborator                                            |                                                                                            |
| Kristina A.                       | Betters         |                       | MD               | Monroe Carell Jr. Children's Hospital         | Nashville, Tennessee, USA                | Collaborator                                            |                                                                                            |
| Haya                              | Hayek           |                       | MD               | Monroe Carell Jr. Children's Hospital         | Nashville, Tennessee, USA                | Collaborator                                            |                                                                                            |
| Molly                             | Maranto         |                       | BS               | MUSC Shawn Jenkins Children's Hospital        | Charleston, South Carolina, USA          | Collaborator                                            |                                                                                            |
| Aubrie                            | Waters          |                       | BS               | MUSC Shawn Jenkins Children's Hospital        | Charleston, South Carolina, USA          | Collaborator                                            |                                                                                            |
| Maggie                            | Flowers         |                       | BSN, RN          | Nationwide Children's Hospital                | Columbus, Ohio, USA                      | Collaborator                                            |                                                                                            |
| Kevin                             | Havlin          |                       | MD               | Norton Children's Hospital                    | Louisville, Kentucky, USA                | Collaborator                                            |                                                                                            |
| Jamie                             | Furlong-Dillard |                       | DO               | Norton Children's Hospital                    | Louisville, Kentucky, USA                | Collaborator                                            |                                                                                            |
| Melissa                           | Porter          |                       | MD               | Norton Children's Hospital                    | Louisville, Kentucky, USA                | Collaborator                                            |                                                                                            |
| Jennifer                          | Nason           |                       | RN, BSN, C       | Norton Children's Hospital                    | Louisville, Kentucky, USA                | Collaborator                                            |                                                                                            |
| Madison                           | Ray             |                       | RN               | Norton Children's Hospital                    | Louisville, Kentucky, USA                | Collaborator                                            |                                                                                            |
| Kristen                           | Gossett         |                       | BS, CCRC         | Norton Children's Hospital                    | Louisville, Kentucky, USA                | Collaborator                                            |                                                                                            |
| Hillary                           | Crandall        |                       | MD, PhD          | Primary Children's Hospital                   | Salt Lake City, Utah, USA                | Collaborator                                            |                                                                                            |
| Evan                              | Heller          |                       | BS, CCRC         | Primary Children's Hospital                   | Salt Lake City, Utah, USA                | Collaborator                                            |                                                                                            |
| Jennifer                          | Foley           |                       | RN, BSN          | Rady Children's Hospital San Diego            | San Diego, California, USA               | Collaborator                                            |                                                                                            |
| Rajashri                          | Rasal           |                       | MPH, CCRP        | Rainbow Babies and Children's Hospital        | Cleveland, Ohio, USA                     | Collaborator                                            |                                                                                            |
| Christine                         | Marlow          |                       | BA               | Rainbow Babies and Children's Hospital        | Cleveland, Ohio, USA                     | Collaborator                                            |                                                                                            |
| Anurithi                          | Senthil         |                       | BA               | Rainbow Babies and Children's Hospital        | Cleveland, Ohio, USA                     | Collaborator                                            |                                                                                            |
| Kimberly                          | Myers           |                       | BSN              | Rainbow Babies and Children's Hospital        | Cleveland, Ohio, USA                     | Collaborator                                            |                                                                                            |
| Betsy                             | Tudor           |                       | CCMA             | Riley Hospital for Children                   | Indianapolis, Indiana, USA               | Collaborator                                            |                                                                                            |
| Amanda                            | Adler           |                       | BS               | Seattle Children's Hospital                   | Seattle, Washington, USA                 | Collaborator                                            |                                                                                            |

Supplemental Online Content: Nonauthor Collaborators

\*First name, last name, and suffix (if applicable) are required and will appear in PubMed.

| *First Name and Middle Initial(s) | *Last Name       | *Suffix (eg, Jr, III) | Academic Degrees | Institution                           | Location (city, state/province, country) | Role or Contribution, eg, chair, principal investigator | Group (if more than 1 Group listed in the byline) and/or Subgroup (eg, Steering Committee) |
|-----------------------------------|------------------|-----------------------|------------------|---------------------------------------|------------------------------------------|---------------------------------------------------------|--------------------------------------------------------------------------------------------|
| Nereyda                           | Garcia           |                       | MD               | Texas Children's Hospital             | Houston, Texas, USA                      | Collaborator                                            |                                                                                            |
| Natalie                           | Treister         |                       | BS               | UCSF Benioff Children's Hospital Oak  | Oakland, California, USA                 | Collaborator                                            |                                                                                            |
| Patrick S.                        | McQuillen        |                       | MD               | UCSF Benioff Children's Hospital San  | San Francisco, California, U             | Collaborator                                            |                                                                                            |
| Kathleen                          | Sun              |                       | BA               | UCSF Benioff Children's Hospital San  | San Francisco, California, U             | Collaborator                                            |                                                                                            |
| Denise                            | Villarreal-Chico |                       | BA               | UCSF Benioff Children's Hospital San  | San Francisco, California, U             | Collaborator                                            |                                                                                            |
| Sophia                            | Kainaroi         |                       | BS               | UPMC Children's Hospital of Pittsburg | Pittsburgh, Pennsylvania, U              | Collaborator                                            |                                                                                            |
| John V.                           | Williams         |                       | MD               | UPMC Children's Hospital of Pittsburg | Pittsburgh, Pennsylvania, U              | Collaborator                                            |                                                                                            |
