# Supplementary material for: Infants Admitted to US Intensive Care Units for RSV Infection During the 2022 Seasonal Peak
Source: PubMed Central journal article supplement (PMC10427947; doi:10.1001/jamanetworkopen.2023.28950), 2023-08-15
Supplement: jamanetwopen-e2328950-s003.pdf [file jamanetwopen-e2328950-s003.pdf]

## Data Sharing Statement

Halasa. Infants Admitted to US Intensive Care Units for RSV Infection During the 2022 Seasonal Peak. *JAMA Netw Open*. Published August 15, 2023.

doi:10.1001/jamanetworkopen.2023.28950

### Data

**Data available:** Yes

**Data types:** Deidentified participant data

**How to access data:** only upon formal request

**When available:** With publication

### Supporting Documents

**Document types:** None

### Additional Information

**Who can access the data:** researchers whose proposed use of the data has been approved

**Types of analyses:** For a specified purpose

**Mechanisms of data availability:** with a signed data access agreement
